# Supplementary material for: Epigenome-wide methylation in DNA from peripheral blood as a marker of risk for breast cancer
Source: Springer Nature journal article supplement (doi:10.1007/s10549-014-3209-y), 2014-11-19

**METHODS**

**Subjects and samples**

Subjects were selected from participants in the Melbourne Collaborative Cohort Study, a prospective cohort study of 41,514 volunteers (24,469 women) aged between 27 and 76 years at baseline (99.3% of whom were aged 40-69)[35](#_ENREF_35). At baseline attendance, participants completed questionnaires that measured demographic characteristics and lifestyle factors including diet. Height and weight were directly measured and a blood sample was collected and stored. For a large proportion of individuals (75%) only dried blood spots (i.e. DBS) on Guthrie cards were available while for others buffy coat or lymphocyte samples were available.

**Nested case-control study**

To estimate the association between aberrant DNA methylation from samples collected at baseline and breast cancer risk we conducted a nested case-control study and used the Infinium HM450 produced by Illumina to quantify DNA methylation in more than 480,000 CpG sites covering up to 96% of CpG islands as well as a large number of non-island CpG sites [22](#_ENREF_22),[23](#_ENREF_23).

The study sample included women in the nested case-control study that we designed to estimate the association between mammographic density and breast cancer risk [36](#_ENREF_36). In the mammographic density study, cases were women with a first diagnosis of ductal carcinoma *in situ* (DCIS; 120 cases) or invasive adenocarcinoma of the breast (International Classification of Diseases for Oncology, C50.0-C50.9; 680 cases) occurring between baseline interview up until 31 December 2007 and ascertained by record linkage to the population-based Victorian Cancer Registry (VCR), and to the Australian Cancer Database. For each breast cancer case, we randomly selected 4 women as controls from among those who had not been diagnosed with breast cancer at the age of diagnosis of the case (*reference age*). The controls were also matched on year of birth, year of baseline attendance and country of origin (classified as Australia/New Zealand/UK/others, Italy or Greece). To be eligible for the methylation case-control study women in the mammographic density case-control study had to have at least one mammogram already retrieved at the time the study sample was assembled (first trimester 2010) and available blood collected at baseline interview. The sample included 498 invasive breast cancer cases and one control per case randomly selected from the four controls matching, when possible, on type of biospecimen (DBS, buffy coat, or lymphocyte).

**Tumour characteristics**

Tumour characteristics were extracted from the VCR database; these include tumour grade, size, nodal status, oestrogen receptor status (ER), progesterone receptor status (PR) and epidermal growth factor 2 status (Her2). Additional assessment of ER, PR, HER2, EGRF1 and CK56 status using immunohistochemistry techniques was performed by a single pathologist (CM) [37](#_ENREF_37). For the analyses presented in this paper, we used our immunohistochemistry measures of ER, PR and HER2 and given the good agreement with the results from the original pathology report [37](#_ENREF_37), when archival tumour tissue was not available, ER, PR and HER2 status was assigned according to the histopathology reports held at the VCR.

**Biospecimens, DNA extraction and DNA methylation measures**

In 485 matching sets both case and control had the same biospecimen available (373 DBS, 103 lymphocytes, 9 buffy coats); of the remaining 13 sets, in 5 the biospecimens were buffy coat and lymphocytes and in 8 DBS and lymphocytes. This resulted in 754 samples from DBS (76%), 219 from lymphocytes (22%) and 23 from buffy coats (2%).

DNA extraction from lymphocytes and buffy coats were performed using Qiagen mini spin columns (Hilden, Germany) while dried blood spot DNA was extracted using a method developed in-house [38](#_ENREF_38): twenty 3·2 mm diameter archived blood spot punches were added to 200 ul phosphate buffered saline and homogenised using the TissueLyser (Qiagen). The resulting supernatant was transferred to a clean 1·5 ml tube and DNA extracted using Qiagen mini spin columns according to the manufacturer’s protocol. The quality and quantity of DNA was assessed using the Quant-iT™ Picogreen® dsDNA assay measured on the Qubit® Fluorometer (Life Technologies, Grand Island, NY).

Bisulfite conversion (EZ DNA Methylation-Gold kit, Zymo Research, Irvine, CA), quality control analyses and the Infinium HM450 DNA methylation assays were performed at the Australian Genome Research Facility as per the manufacturers’ instructions. The bisulfite conversion control dashboard on the Illumina arrays was primarily used to check success of the conversion. Also, a bioanalyser run was performed on a subset of samples in each batch to further check the success of the conversion.

Samples were distributed into 96-well plates and processed by Infinium HM450 in chips of 12 arrays (8 chips per plate) with case-control pairs arranged consecutively on the same chip.

**Data processing**

Methylation data were normalised to the internal built-in controls as provided by the standard Illumina software and subset-quantile within array normalization (SWAN) for type I and II probe bias correction [39](#_ENREF_39). We excluded the 416 CpGs sites on the Y chromosome and the 65 corresponding to single nucleotide polymorphisms. We assigned the methylation measures at CpG sites with a detection p-value higher than 0·01 as missing. Samples for which more than 5% of the CpG measures were missing were considered as “failed” and excluded from further analyses as were the CpG sites whose measures were missing for more than 20% of the samples.

**References for Online Resource**

**1.** Das PM, Singal R. DNA methylation and cancer. *Journal of clinical oncology : official journal of the American Society of Clinical Oncology.* Nov 15 2004;22(22):4632-4642.

**2.** Kulis M, Esteller M. DNA methylation and cancer. *Advances in genetics.* 2010;70:27-56.

**3.** Phillips T. The role of methylation in gene expression. *Nature Education.* 2008;1(1).

**4.** Wilson AS, Power BE, Molloy PL. DNA hypomethylation and human diseases. *Biochimica et biophysica acta.* Jan 2007;1775(1):138-162.

**5.** Hinshelwood RA, Clark SJ. Breast cancer epigenetics: normal human mammary epithelial cells as a model system. *Journal of molecular medicine.* Dec 2008;86(12):1315-1328.

**6.** Jovanovic J, Ronneberg JA, Tost J, Kristensen V. The epigenetics of breast cancer. *Molecular oncology.* Jun 2010;4(3):242-254.

**7.** Kristiansen S, Jorgensen LM, Guldberg P, Soletormos G. Aberrantly methylated DNA as a biomarker in breast cancer. *The International journal of biological markers.* Apr-Jun 2013;28(2):141-150.

**8.** Szyf M. DNA methylation signatures for breast cancer classification and prognosis. *Genome medicine.* Mar 30 2012;4(3):26.

**9.** Fang F, Turcan S, Rimner A, et al. Breast cancer methylomes establish an epigenomic foundation for metastasis. *Science translational medicine.* Mar 23 2011;3(75):75ra25.

**10.** Zhuang J, Jones A, Lee SH, et al. The dynamics and prognostic potential of DNA methylation changes at stem cell gene loci in women's cancer. *PLoS genetics.* Feb 2012;8(2):e1002517.

**11.** Fackler MJ, Malone K, Zhang Z, et al. Quantitative multiplex methylation-specific PCR analysis doubles detection of tumor cells in breast ductal fluid. *Clinical cancer research.* Jun 1 2006;12(11 Pt 1):3306-3310.

**12.** Hoque MO, Feng Q, Toure P, et al. Detection of aberrant methylation of four genes in plasma DNA for the detection of breast cancer. *Journal of clinical oncology.* Sep 10 2006;24(26):4262-4269.

**13.** Horvath S, Zhang Y, Langfelder P, et al. Aging effects on DNA methylation modules in human brain and blood tissue. *Genome biology.* Oct 3 2012;13(10):R97.

**14.** Lim U, Flood A, Choi SW, et al. Genomic methylation of leukocyte DNA in relation to colorectal adenoma among asymptomatic women. *Gastroenterology.* Jan 2008;134(1):47-55.

**15.** Pufulete M, Al-Ghnaniem R, Leather AJ, et al. Folate status, genomic DNA hypomethylation, and risk of colorectal adenoma and cancer: a case control study. *Gastroenterology.* May 2003;124(5):1240-1248.

**16.** Hsiung DT, Marsit CJ, Houseman EA, et al. Global DNA methylation level in whole blood as a biomarker in head and neck squamous cell carcinoma. *Cancer epidemiology, biomarkers & prevention.* Jan 2007;16(1):108-114.

**17.** Moore LE, Pfeiffer RM, Poscablo C, et al. Genomic DNA hypomethylation as a biomarker for bladder cancer susceptibility in the Spanish Bladder Cancer Study: a case-control study. *The lancet oncology.* Apr 2008;9(4):359-366.

**18.** Brennan K, Garcia-Closas M, Orr N, et al. Intragenic ATM methylation in peripheral blood DNA as a biomarker of breast cancer risk. *Cancer research.* May 1 2012;72(9):2304-2313.

**19.** Choi JY, James SR, Link PA, et al. Association between global DNA hypomethylation in leukocytes and risk of breast cancer. *Carcinogenesis.* Nov 2009;30(11):1889-1897.

**20.** Delgado-Cruzata L, Wu HC, Perrin M, et al. Global DNA methylation levels in white blood cell DNA from sisters discordant for breast cancer from the New York site of the Breast Cancer Family Registry. *Epigenetics.* Aug 2012;7(8):868-874.

**21.** Xu X, Gammon MD, Hernandez-Vargas H, et al. DNA methylation in peripheral blood measured by LUMA is associated with breast cancer in a population-based study. *FASEB journal.* Jun 2012;26(6):2657-2666.

**22.** Sandoval J, Heyn H, Moran S, et al. Validation of a DNA methylation microarray for 450,000 CpG sites in the human genome. *Epigenetics.* Jun 2011;6(6):692-702.

**23.** Clark C, Palta P, Joyce CJ, et al. A comparison of the whole genome approach of MeDIP-seq to the targeted approach of the Infinium HumanMethylation450 BeadChip((R)) for methylome profiling. *PloS one.* 2012;7(11):e50233.

**24.** Houseman EA, Accomando WP, Koestler DC, et al. DNA methylation arrays as surrogate measures of cell mixture distribution. *BMC bioinformatics.* 2012;13:86.

**25.** Chen YA, Lemire M, Choufani S, et al. Discovery of cross-reactive probes and polymorphic CpGs in the Illumina Infinium HumanMethylation450 microarray. *Epigenetics.* Feb 2013;8(2):203-209.

**26.** Laird PW. The power and the promise of DNA methylation markers. *Nature reviews. Cancer.* Apr 2003;3(4):253-266.

**27.** Woo HD, Kim J. Global DNA hypomethylation in peripheral blood leukocytes as a biomarker for cancer risk: a meta-analysis. *PloS one.* 2012;7(4):e34615.

**28.** Ostertag EM, Kazazian HH, Jr. Biology of mammalian L1 retrotransposons. *Annual review of genetics.* 2001;35:501-538.

**29.** Hoffmann MJ, Schulz WA. Causes and consequences of DNA hypomethylation in human cancer. *Biochemistry and cell biology.* Jun 2005;83(3):296-321.

**30.** Horard B, Eymery A, Fourel G, et al. Global analysis of DNA methylation and transcription of human repetitive sequences. *Epigenetics.* Jul 1 2009;4(5):339-350.

**31.** Wu HC, Wang Q, Yang HI, Tsai WY, Chen CJ, Santella RM. Global DNA methylation levels in white blood cells as a biomarker for hepatocellular carcinoma risk: a nested case-control study. *Carcinogenesis.* Jul 2012;33(7):1340-1345.

**32.** Xu Z, Bolick SC, DeRoo LA, Weinberg CR, Sandler DP, Taylor JA. Epigenome-wide association study of breast cancer using prospectively collected sister study samples. *Journal of the National Cancer Institute.* May 15 2013;105(10):694-700.

**33.** Michailidou K, Hall P, Gonzalez-Neira A, et al. Large-scale genotyping identifies 41 new loci associated with breast cancer risk. *Nature genetics.* Apr 2013;45(4):353-361, 361e351-352.

**34.** Severi G, Byrnes GB, Hopper JL. Five genetic variants associated with prostate cancer. *The New England journal of medicine.* Jun 19 2008;358(25):2739-2740; author reply 2741.

**35.** Giles GG, English DR. The Melbourne Collaborative Cohort Study. *IARC scientific publications.* 2002;156:69-70.

**36.** Baglietto L, Krishnan K, Stone J, et al. Associations of Mammographic Dense and Nondense Areas and Body Mass Index With Risk of Breast Cancer. *American journal of epidemiology.* Oct 28 2013.

**37.** Krishnan K, Bassett JK, Macinnis RJ, et al. Associations between weight in early adulthood, change in weight and breast cancer risk in postmenopausal women. *Cancer epidemiology, biomarkers & prevention.* May 29 2013.

**38.** Joo JE, Wong EM, Baglietto L, et al. The use of DNA from archival dried blood spots with the Infinium HumanMethylation450 array. *BMC biotechnology.* 2013;13:23.

**39.** Maksimovic J, Gordon L, Oshlack A. SWAN: Subset-quantile within array normalization for illumina infinium HumanMethylation450 BeadChips. *Genome biology.* 2012;13(6):R44.

**Online Resource Table 1** Characteristics of the study sample

|  |  | **Cases** | **Controls** |
| --- | --- | --- | --- |
|  |  | **N=420** | **N=420** |
|  |  |  |  |
| Age at blood collection |  | Mean: 56 | Mean=56 |
|  |  | SD=8 | SD=8 |
|  |  | Range=(38 to 70) | Range=(38 to 70) |
|  |  |  | Mean=56 |
|  |  |  |  |
| Biospecimen | Guthrie Card | 325 | 320 |
|  | Lymphocytes | 84 | 92 |
|  | Buffy Coats | 11 | 8 |
|  |  |  |  |
| Country of Origin | Australia/NZ/UK | 355 | 356 |
|  | Italy/Greece | 65 | 64 |
|  |  |  |  |
| Reference age (*) |  | Mean: 64 |  |
|  |  | SD: 8 |  |
|  |  | Range: 44 to 83 |  |
|  |  |  |  |
| Time from blood collection to reference age | <5years | 131 |  |
| 5-9years | 148 |  |
|  | 10 years or more | 141 |  |
|  |  |  |  |
| Grade | Well differentiated | 87 |  |
|  | Moderately differentiated | 179 |  |
|  | Highly differentiated | 120 |  |
|  | Missing | 34 |  |
|  |  |  |  |
| Size | Less than 2 cm | 286 |  |
|  | 2 cm or more | 123 |  |
|  | Missing | 11 |  |
|  |  |  |  |
| Nodal Status | Negative | 398 |  |
|  | Positive | 86 |  |
|  | Missing | 36 |  |
|  |  |  |  |
| ER | Negative | 98 |  |
|  | Positive | 297 |  |
|  | Missing | 25 |  |
|  |  |  |  |
| PR | Negative | 173 |  |
|  | Positive | 217 |  |
|  | Missing | 30 |  |
|  |  |  |  |
| HER2 | Negative | 281 |  |
|  | Positive | 109 |  |
|  | Missing | 30 |  |
|  |  |  |  |
| Subtype | Luminal A | 221 |  |
|  | Luminal B | 87 |  |
|  | HER2+ | 20 |  |
|  | Triple Negative | 54 |  |
|  | Missing | 38 |  |

(*) Age at diagnosis for the cases and age of the case in the matching set for the controls

**Online Resource Table 2** Proportion of the total variance explained by the first 10 principal components and their correlation with global methylation overall and by CpG genomic feature

|  | **PC1** | **PC2** | **PC3** | **PC4** | **PC5** | **PC6** | **PC7** | **PC8** | **PC9** | **PC10** |
| --- | --- | --- | --- | --- | --- | --- | --- | --- | --- | --- |
| **Total variance explained** |  |  |  |  |  |  |  |  |  |  |
| Proportion | 0·274 | 0·062 | 0·023 | 0·017 | 0·015 | 0·009 | 0·008 | 0·006 | 0·005 | 0·004 |
| Cumulative Proportion | 0·274 | 0·336 | 0·359 | 0·376 | 0·391 | 0·400 | 0·408 | 0·414 | 0·419 | 0·423 |
| **Correlations** |  |  |  |  |  |  |  |  |  |  |
| All | 0·56 | 0·67 | 0·31 | 0·15 | -0·30 | -0·03 | -0·09 | 0·02 | -0·02 | -0·02 |
| Island/Shore | 0·79 | 0·15 | 0·30 | 0·33 | -0·36 | 0·07 | -0·08 | -0·04 | -0·05 | 0·00 |
| Shelf/None | 0·22 | 0·89 | 0·30 | -0·04 | -0·20 | -0·10 | -0·06 | 0·04 | 0·00 | -0·02 |
| Functional Promoter | 0·38 | -0·25 | 0·19 | 0·43 | -0·65 | -0·01 | -0·26 | -0·14 | -0·05 | 0·07 |
| Non Functional Promoter | 0·54 | 0·73 | 0·32 | 0·10 | -0·23 | -0·03 | -0·05 | 0·03 | -0·02 | -0·03 |
| Repetitive Elements | 0·33 | 0·88 | 0·21 | 0·02 | -0·22 | -0·06 | -0·07 | 0·01 | 0·00 | -0·04 |
| Non Repetitive Elements | 0·62 | 0·58 | 0·34 | 0·20 | -0·32 | -0·02 | -0·09 | 0·02 | -0·02 | -0·01 |

**Online Resource Table 3** Relative risk of breast cancer for 1 standard deviation of the first, second, fifth and eight principal components

|  | **Overall** | |  | **By time since blood collection** | | |
| --- | --- | --- | --- | --- | --- | --- |
|  | **RR (95% CI)** | **p** |  |  | **RR (95% CI)** | **p** |
| PC1 | 0·74 (0·56-0·99) | 0·04 |  | <5 years | 0·44 (0·25-0·79) | *0·006* |
|  |  |  |  | 5-9 years | 0·99 (0·61-1·61) | *0·98* |
|  |  |  |  | 10 years or more | 0·82 (0·49-1·37) | *0·44* |
|  |  |  |  |  | *test for linear trend* | *0·21* |
|  |  |  |  |  |  |  |
| PC2 | 0·66 (0·51-0·86) | 0·002 |  | <5 years | 0·45 (0·27-0·74) | 0·002 |
|  |  |  |  | 5-9 years | 0·66 (0·43-1·02) | 0·06 |
|  |  |  |  | 10 years or more | 0·83 (0·51-1·34) | 0·44 |
|  |  |  |  |  | *test for linear trend* | *0·1* |
|  |  |  |  |  |  |  |
| PC5 | 0·83 (0·62-1·09) | 0·18 |  | <5 years | 1·2 (0·73-1·95) | *0·48* |
|  |  |  |  | 5-9 years | 0·73 (0·45-1·2) | *0·22* |
|  |  |  |  | 10 years or more | 0·61 (0·35-1·09) | *0·1* |
|  |  |  |  |  | *test for linear trend* | *0·05* |
|  |  |  |  |  |  |  |
| PC8 | 1·27 (1·00-1·62) | 0·05 |  | <5 years | 1·83 (1·11-3·01) | *0·02* |
|  |  |  |  | 5-9 years | 1·10 (0·76-1·60) | *0·61* |
|  |  |  |  | 10 years or more | 1·04 (0·66-1·64) | *0·86* |
|  |  |  |  |  | *test for linear trend* | *0·02* |

**Online Resource Figure 1**  Difference in epigenome-wide methylation between cases and controls by time between blood collection and diagnosis (number of sets in each time frame in red)


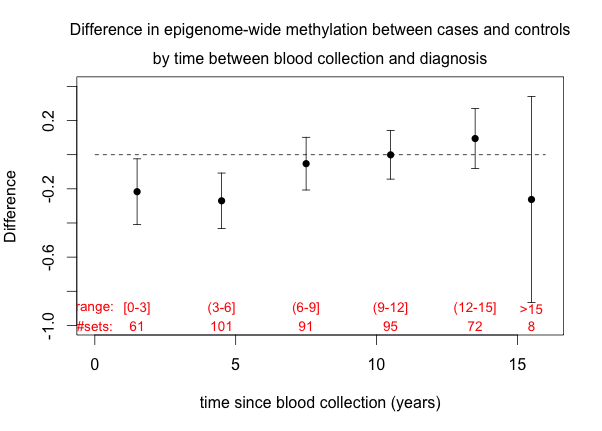


**Online Resource Figure 2**  Score plots of principle components analysis showing the first component (PC1, x-axis) versus the second component (PC2, y-axis). Incident breast cancer cases are shown in red with controls in black


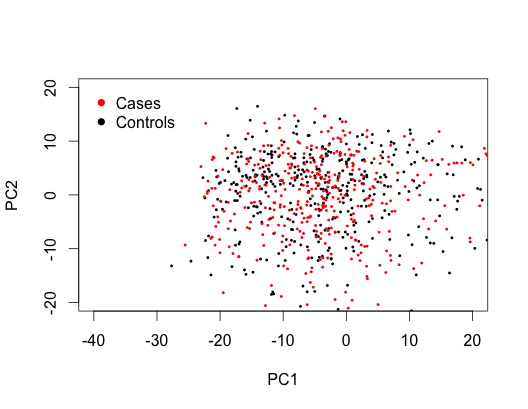

Supplement: MOESM1 [file 8846774]
